# Supplementary material for: Lis1 Acts as a “Clutch” between the ATPase and Microtubule-Binding Domains of the Dynein Motor
Source: PubMed Central journal article supplement (PMC3438448; doi:10.1016/j.cell.2012.07.022), 2012-08-31
Supplement: mmc1.pdf [file mmc1.pdf]

Table S1. Yeast Strains

| Strain  | Genotype                                                                                                                                                  | Figure(s)<br>Reference                        |
|---------|-----------------------------------------------------------------------------------------------------------------------------------------------------------|-----------------------------------------------|
| RPY1    | W303a ( <i>MATa his3-11,15 ura3-1 leu2-3,112 ade2-1 trp1-1</i> )                                                                                          | Figures 1, 6, S5<br>(Eshel et al., 1993)      |
| RPY218  | W303a <i>pep4Δ::HIS5 prb1Δ PAC11-13xMYC-TRP1 ZZ-Tev-GFP-3xHA-DYN1-gs-DHA-Kan<sup>R</sup></i>                                                              | Figure S2<br>(Reck-Peterson et al., 2006)     |
| RPY266  | W303a <i>pep4Δ::HIS5 prb1Δ PAC11-13xMYC-TRP1 ZZ-Tev-GFP-3xHA-DYN1-gs-DHA-Kan<sup>R</sup> pac1Δ::klURA3</i>                                                | Figures 2, S2<br>(Reck-Peterson et al., 2006) |
| RPY708  | W303a <i>pep4Δ::HIS5 prb1Δ PAC11-13xMYC-TRP1 ZZ-Tev-GFP-3xHA-DYN1-gs-DHA-Kan<sup>R</sup> PAC1-3xFLAG</i>                                                  | Figures 2, S2<br>This work                    |
| RPY710  | W303a <i>pep4Δ::HIS5 prb1Δ PAC11-13xMYC-TRP1 ZZ-Tev-GFP-3xHA-DYN1-gs-DHA-Kan<sup>R</sup> PAC1<sup>3-129Δ</sup>-3xFLAG-klURA3</i>                          | Figures 2, S2<br>This work                    |
| RPY753  | W303a <i>pep4Δ::HIS5 prb1Δ P<sub>GAL1</sub>-ZZ-Tev-GFP-3xHA-GST-DYN1<sub>331 kDa</sub>-gs-DHA pac1Δ::klURA3 ndl1Δ::cgLEU2</i>                             | Figures 2-6, S2-S5; Table S2<br>This work     |
| RPY780  | W303a <i>pep4Δ::HIS5 prb1Δ ZZ-Tev-3xHA-DYN1-gs-DHA-Kan<sup>R</sup> nip100Δ pac1Δ::Hygro<sup>R</sup> ndl1Δ::cgLEU2</i>                                     | Figures 1, S1; Table S2<br>This work          |
| RPY806  | W303a <i>ndl1Δ::Kan<sup>R</sup></i>                                                                                                                       | Figure 1<br>This work                         |
| RPY809  | W303a <i>pac1Δ::Hygro<sup>R</sup></i>                                                                                                                     | Figures 1, 6, S5<br>This work                 |
| RPY831  | W303a <i>PAC1-g-1xFLAG-ga-SNAP-Kan<sup>R</sup></i>                                                                                                        | Figure 1<br>This work                         |
| RPY842  | W303a <i>pep4Δ::HIS5 prb1Δ P<sub>GAL1</sub>-HIS<sub>8</sub>-ZZ-Tev-PAC1-g-1xFLAG-ga-SNAP-Kan<sup>R</sup> dyn1Δ::cgLEU2 ndl1Δ::Hygro<sup>R</sup></i>       | Figures 1-6, S1-S5; Table S2<br>This work     |
| RPY844  | W303a <i>pep4Δ::HIS5 prb1Δ PAC11-13xMYC-TRP1 P<sub>GAL1</sub>-ZZ-Tev-GFP-3xHA-DYN1<sub>331 kDa</sub> pac1Δ::Hygro<sup>R</sup></i>                         | Figures 2, S3<br>This work                    |
| RPY870  | W303a <i>NDL1-ga-SNAP-Tev-ZZ-klTRP1</i>                                                                                                                   | Figure 1<br>This work                         |
| RPY873  | W303a <i>pep4Δ::HIS5 prb1Δ NDL1-ga-SNAP-Tev-ZZ-klTRP1</i>                                                                                                 | Figures 1, S1<br>This work                    |
| RPY1042 | W303a <i>pep4Δ::HIS5 prb1Δ P<sub>GAL1</sub>-8HIS-ZZ-Tev-PAC1<sup>3-129Δ</sup>-g-1xFLAG-ga-SNAP-Kan<sup>R</sup> dyn1Δ::cgLEU2 ndl1Δ::Hygro<sup>R</sup></i> | Figures 2, S2<br>This work                    |
| RPY1116 | W303a <i>pep4Δ::HIS5 prb1Δ ZZ-Tev-GFP-3xHA-DYN1-gs-DHA-Kan<sup>R</sup> PAC11-13xMYC-TRP1 P<sub>GAL1</sub>-PAC1-3xFLAG</i>                                 | Figure S2<br>This work                        |
| RPY1118 | W303a <i>pep4Δ::HIS5 prb1Δ PAC11-13xMYC-TRP1 ZZ-Tev-GFP-3xHA-DYN1-gs-DHA-Kan<sup>R</sup> P<sub>GAL1</sub>-PAC1(aa 3-129Δ)-3xFLAG</i>                      | Figures 2, S2<br>This work                    |
| RPY1176 | W303a <i>pep4Δ::HIS5 prb1Δ P<sub>GAL1</sub>-ZZ-Tev-GFP-3xHA-GST-DYN1<sup>R2911C</sup>-gs-DHA pac1Δ ndl1Δ::cgLEU2</i>                                      | Figure 6<br>This work                         |

|         |                                                                                                                                                          |                                      |
|---------|----------------------------------------------------------------------------------------------------------------------------------------------------------|--------------------------------------|
| RPY1198 | W303a <i>pep4Δ::HIS5 prb1Δ PAC11-13xMYC-TRP1 P<sub>GAL1</sub>-ZZ-Tev-GFP-3xHA-DYN1<sub>331 kDa</sub>-gs-DHA-Kan<sup>R</sup> pac1Δ::Hygro<sup>R</sup></i> | Figure 3<br>This work                |
| RPY1199 | W303a <i>dyn1Δ::cgLEU2</i>                                                                                                                               | Figures 1, 6, S5<br>This work        |
| RPY1203 | W303a <i>DYN1<sup>R2911C</sup></i>                                                                                                                       | Figure S5<br>This work               |
| RPY1207 | W303a <i>DYN1<sup>R2911C</sup> pac1Δ::Kan<sup>R</sup></i>                                                                                                | Figure S5<br>This work               |
| RPY1211 | W303a <i>pep4Δ::HIS5 prb1Δ P<sub>GAL1</sub>-ZZ-Tev-GFP-3xHA-GST-DYN1<sup>K2721E</sup>-gs-DHA pac1Δ ndl1Δ::cgLEU2</i>                                     | Figure 6; Table S2<br>This work      |
| RPY1223 | W303a <i>DYN1<sup>K2721E</sup></i>                                                                                                                       | Figure 6<br>This work                |
| RPY1237 | W303a <i>DYN1<sup>K2721A, D2725G, E2726S, E2727G</sup></i>                                                                                               | Figure 6<br>This work                |
| RPY1238 | W303a <i>pep4Δ::HIS5 prb1Δ P<sub>GAL1</sub>-ZZ-Tev-GFP-3xHA-GST-DYN1<sup>K2721A, D2725G, E2726S, E2727G</sup>-gs-DHA pac1Δ ndl1Δ::cgLEU2</i>             | Figures 6, S5; Table S2<br>This work |

All strains were made in the RPY1 background with additional changes noted. *DYN1*, *PAC11*, *PAC1*, *NDL1*, and *NIP100* encode the dynein heavy chain, dynein intermediate chain, Lis1, Nudel, and dynactin subunit p150<sup>glued</sup> orthologs, respectively. Monomeric Lis1 was constructed by removal of amino acids 3-129. *DHA* and *SNAP* refer to the HaloTag (Promega) and SNAP-tag (NEB), respectively. *TEV* indicates a Tev protease cleavage site. *P<sub>GAL1</sub>* denotes the galactose promoter, which was used for inducing strong expression of Lis1 and dynein motor domain constructs. Amino acid spacers are indicated by *g* (glycine), *ga* (glycine-alanine), and *gs* (glycine-serine). Genes encoding proteases *Pep4* and *Prb1* were deleted as noted.

Table S2. Dynein Velocities, Related to Figures 1, 2, and 6

**A. Related to Figure 1G**

|                       | [Lis1]<br>(nM) | velocity<br>(nm/s) | SD    | SE     | N   |
|-----------------------|----------------|--------------------|-------|--------|-----|
| <i>dynein (set 1)</i> | 0              | 102.4              | 32.34 | 1.783  | 329 |
|                       | 37.5           | 53.25              | 23.82 | 1.866  | 163 |
|                       | 75             | 44.72              | 18.48 | 1.021  | 328 |
|                       | 150            | 36.53              | 15.40 | 1.192  | 167 |
|                       | 300            | 23.06              | 8.505 | 0.6662 | 163 |
|                       | 600            | 8.622              | 7.007 | 0.4980 | 198 |
|                       | 1200           | 5.448              | 3.013 | 0.1770 | 290 |
| <i>dynein (set 2)</i> | 0              | 100.5              | 37.32 | 2.871  | 169 |
|                       | 75             | 47.75              | 19.29 | 1.328  | 211 |
|                       | 150            | 39.94              | 14.84 | 1.241  | 143 |
|                       | 300            | 21.18              | 8.579 | 0.7832 | 120 |
|                       | 600            | 14.97              | 7.173 | 0.7138 | 101 |
|                       | 1200           | 6.674              | 3.536 | 0.3090 | 131 |

**B. Related to Figure 2C**

|                                                 | [Lis1]<br>(nM) | velocity<br>(nm/s) | SD    | SE     | N   |
|-------------------------------------------------|----------------|--------------------|-------|--------|-----|
| <i>GST-dynein<sub>331 kDa</sub><br/>(set 1)</i> | 0              | 113.0              | 58.01 | 5.409  | 115 |
|                                                 | 4.6875         | 96.86              | 57.82 | 5.091  | 129 |
|                                                 | 9.375          | 64.40              | 33.59 | 3.278  | 105 |
|                                                 | 18.75          | 42.18              | 16.65 | 1.288  | 167 |
|                                                 | 37.5           | 35.12              | 12.44 | 1.126  | 122 |
|                                                 | 75             | 30.73              | 11.79 | 0.7725 | 233 |
|                                                 | 150            | 26.50              | 8.699 | 0.8183 | 113 |
|                                                 | 300            | 22.20              | 7.839 | 0.7651 | 105 |
|                                                 | 600            | 10.21              | 3.411 | 0.3063 | 124 |
| <i>GST-dynein<sub>331 kDa</sub><br/>(set 2)</i> | 0              | 115.9              | 67.20 | 14.14  | 227 |
|                                                 | 4.6875         | 91.51              | 54.29 | 12.42  | 206 |
|                                                 | 9.375          | 86.00              | 47.36 | 12.50  | 217 |
|                                                 | 18.75          | 61.32              | 35.93 | 10.23  | 214 |
|                                                 | 37.5           | 44.70              | 19.48 | 10.13  | 215 |

|                                      |        |       |       |       |     |
|--------------------------------------|--------|-------|-------|-------|-----|
|                                      | 75     | 37.84 | 13.62 | 10.25 | 209 |
|                                      | 150    | 27.36 | 9.353 | 8.946 | 204 |
|                                      | 300    | 22.24 | 8.299 | 7.719 | 244 |
|                                      | 600    | 13.15 | 5.915 | 5.406 | 201 |
| <i>GST-dynein</i> <sub>331 kDa</sub> | 0      | 107.6 | 60.35 | 9.825 | 120 |
| (set 3)                              | 4.6875 | 101.1 | 53.82 | 8.975 | 127 |
|                                      | 9.375  | 77.87 | 33.58 | 6.882 | 128 |
|                                      | 18.75  | 62.28 | 30.64 | 5.463 | 130 |
|                                      | 37.5   | 41.95 | 14.65 | 3.830 | 120 |
|                                      | 75     | 33.55 | 13.33 | 3.142 | 114 |
|                                      | 150    | 21.26 | 8.083 | 2.000 | 113 |

C. Related to Figure 6B

|                                      | [Lis1]<br>(nM) | velocity<br>(nm/s) | SD    | SE     | N   |
|--------------------------------------|----------------|--------------------|-------|--------|-----|
| <i>GST-dynein</i> <sub>331 kDa</sub> | 0              | 103.4              | 60.77 | 3.638  | 279 |
| (set 1)                              | 37.5           | 40.68              | 18.84 | 1.270  | 220 |
|                                      | 75             | 32.03              | 12.16 | 0.8073 | 227 |
|                                      | 150            | 23.64              | 8.789 | 0.5980 | 216 |
| <i>GST-dynein</i> <sub>331 kDa</sub> | 0              | 101.0              | 57.79 | 3.810  | 230 |
| (set 2)                              | 37.5           | 43.14              | 20.37 | 1.413  | 208 |
|                                      | 75             | 36.43              | 15.46 | 1.057  | 214 |
|                                      | 150            | 26.04              | 10.41 | 0.7021 | 220 |
| <i>GST-dynein</i> <sup>K</sup>       | 0              | 103.9              | 43.16 | 2.798  | 238 |
| (set 1)                              | 37.5           | 67.17              | 24.37 | 1.557  | 245 |
|                                      | 75             | 55.11              | 19.75 | 1.254  | 248 |
|                                      | 150            | 31.36              | 9.999 | 0.5955 | 282 |
| <i>GST-dynein</i> <sup>K</sup>       | 0              | 120.9              | 66.89 | 4.078  | 269 |
| (set 2)                              | 37.5           | 81.62              | 39.65 | 2.609  | 231 |
|                                      | 75             | 61.73              | 31.73 | 2.222  | 204 |
|                                      | 150            | 48.72              | 19.60 | 1.346  | 212 |
| <i>GST-dynein</i> <sup>KDEE</sup>    | 0              | 98.39              | 55.43 | 3.881  | 204 |
| (set 1)                              | 37.5           | 99.06              | 47.66 | 3.250  | 215 |
|                                      | 75             | 94.91              | 57.06 | 3.646  | 245 |

|                                   |      |       |       |       |     |
|-----------------------------------|------|-------|-------|-------|-----|
|                                   | 150  | 99.91 | 57.73 | 3.984 | 210 |
| <i>GST-dynein</i> <sup>KDEE</sup> | 0    | 99.36 | 89.76 | 5.688 | 249 |
| (set 2)                           | 37.5 | 100.9 | 68.02 | 4.268 | 254 |
|                                   | 75   | 96.56 | 83.78 | 5.489 | 233 |
|                                   | 150  | 93.00 | 66.32 | 4.246 | 244 |
